# Supplementary material for: Optimal Probability Distribution and Applicable Minimum Time-Scale for Daily Standardized Precipitation Index Time Series in South Korea
Source: MDPI journal article supplement (doi:10.3390/atmos14081292), 2023-08-16
Supplement: s1 [file s1]

Archive with 1 entries (1 files):
- atmosphere-2541659-supplementary.pdf
