# Supplementary material for: Optimal Probability Distribution and Applicable Minimum Time-Scale for Daily Standardized Precipitation Index Time Series in South Korea
Source: MDPI journal article supplement (doi:10.3390/atmos14081292), 2023-08-16
Supplement: s1 [file s1 › atmosphere-2541659-supplementary.pdf]

# Supplementary Materials:

Chaelim Lee, Jiyu Seo, Jeongeun Won and Sangdan Kim \*

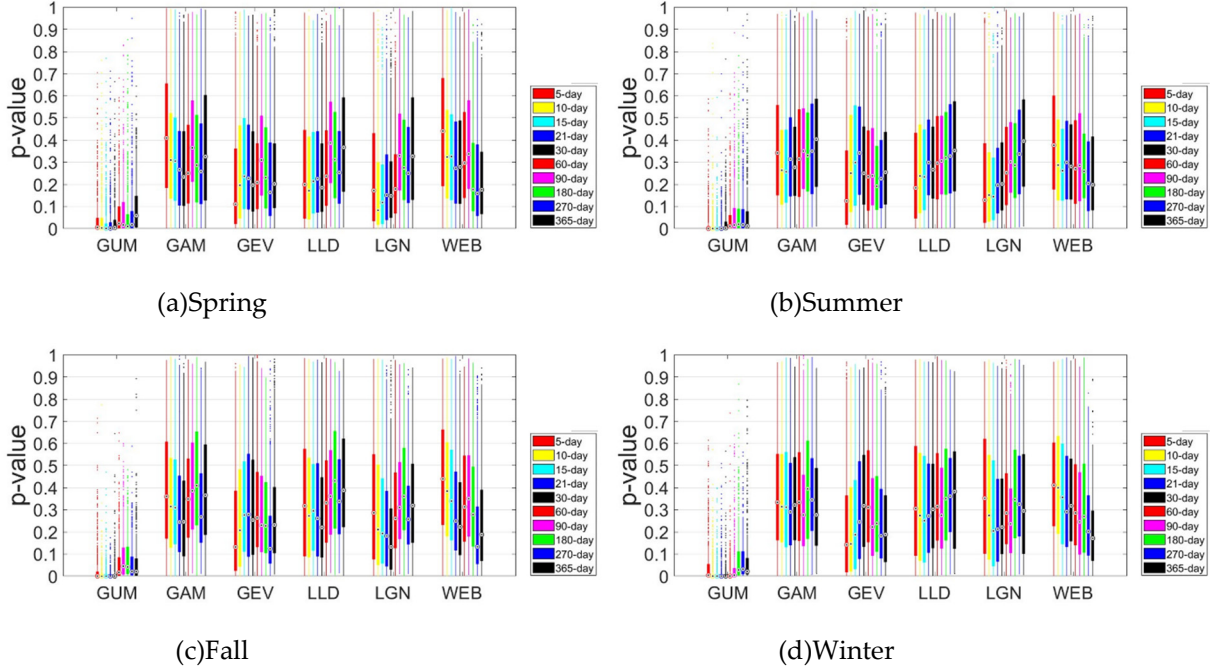

**Figure S1.** Box-plot of the  $p$ -values of the chi-square test for 6 candidate PDFs in 4 seasons in the Gangwon region. (a) Spring, (b) Summer, (c) Fall, (d) Winter

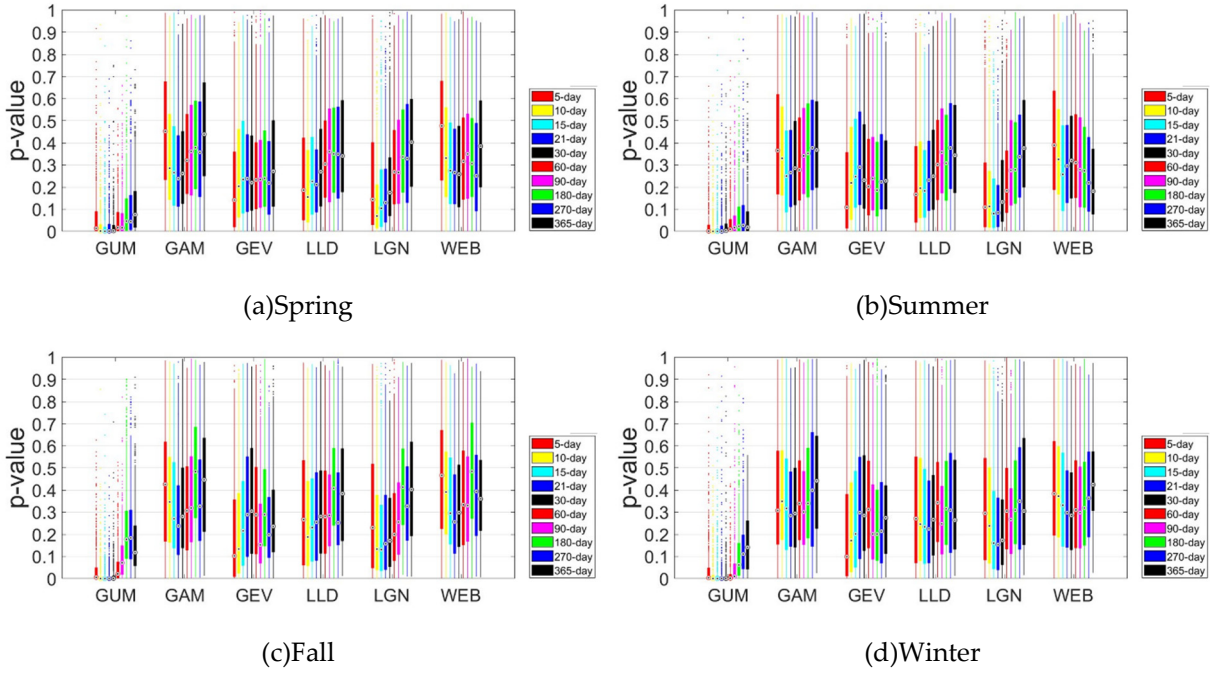

**Figure S2.** Box-plot of the  $p$ -values of the chi-square test for 6 candidate PDFs in 4 seasons in the Capital region. (a) Spring, (b) Summer, (c) Fall, (d) Winter

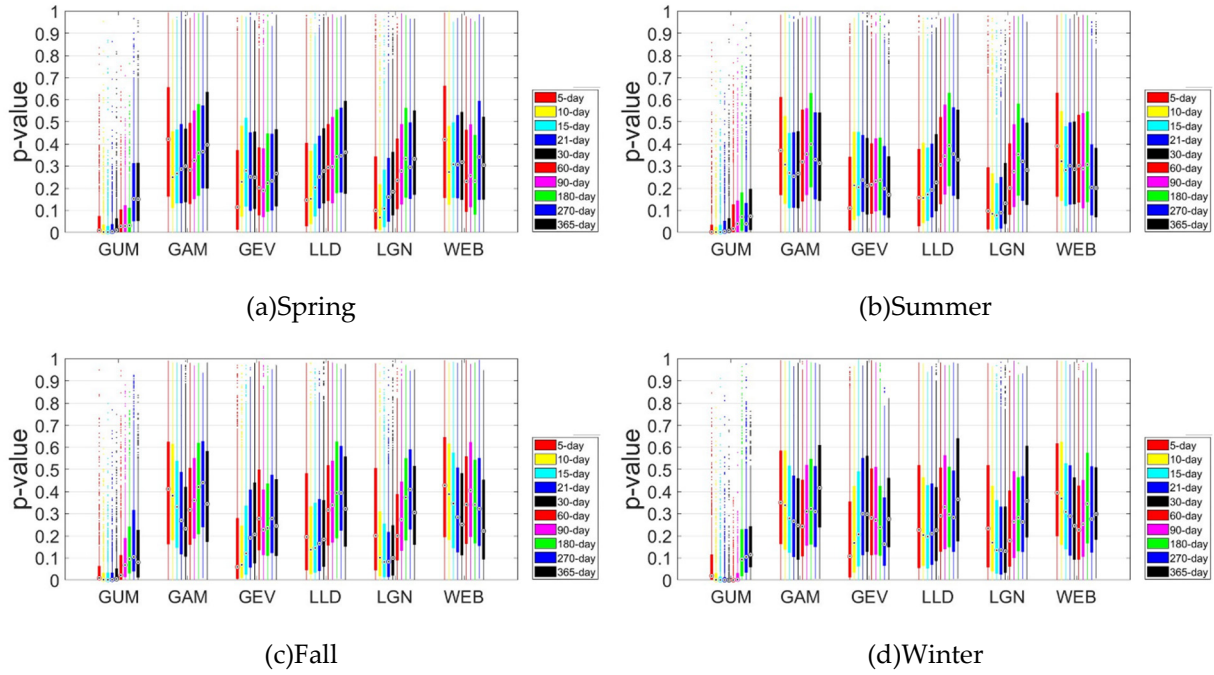

**Figure S3.** Box-plot of the  $p$ -values of the chi-square test for 6 candidate PDFs in 4 seasons in the Buulgyeong region. (a) Spring, (b) Summer, (c) Fall, (d) Winter

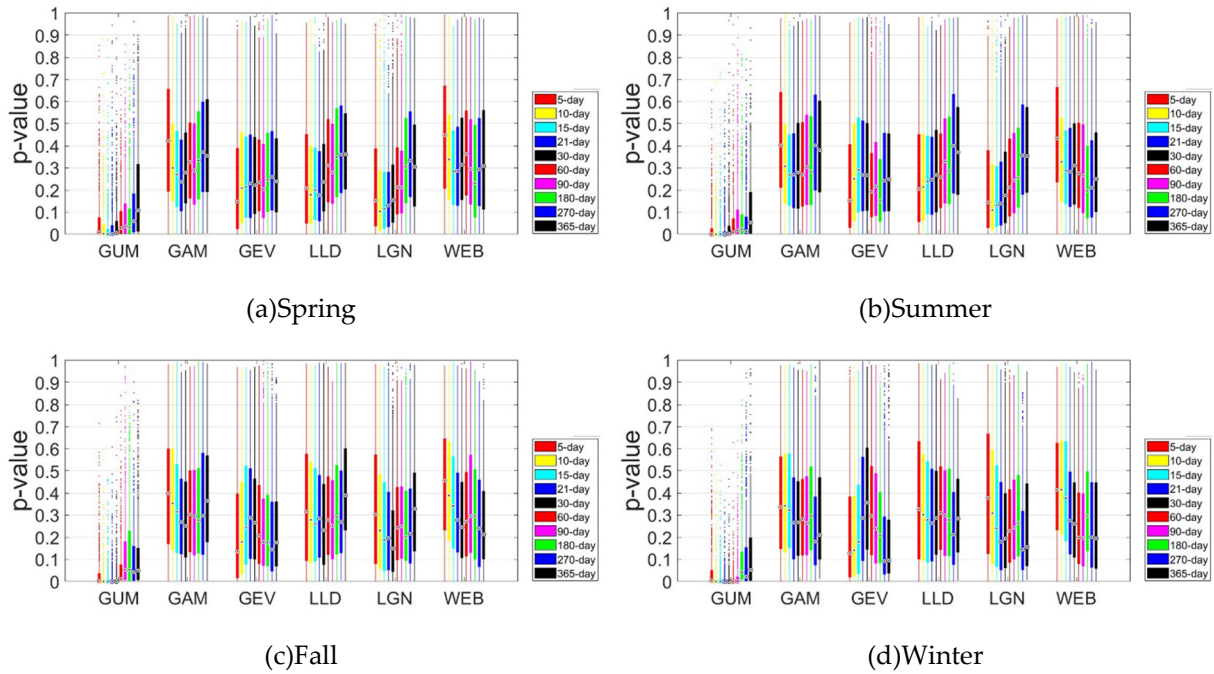

**Figure S4.** Box-plot of the  $p$ -values of the chi-square test for 6 candidate PDFs in 4 seasons in the Daegyong region. (a) Spring, (b) Summer, (c) Fall, (d) Winter

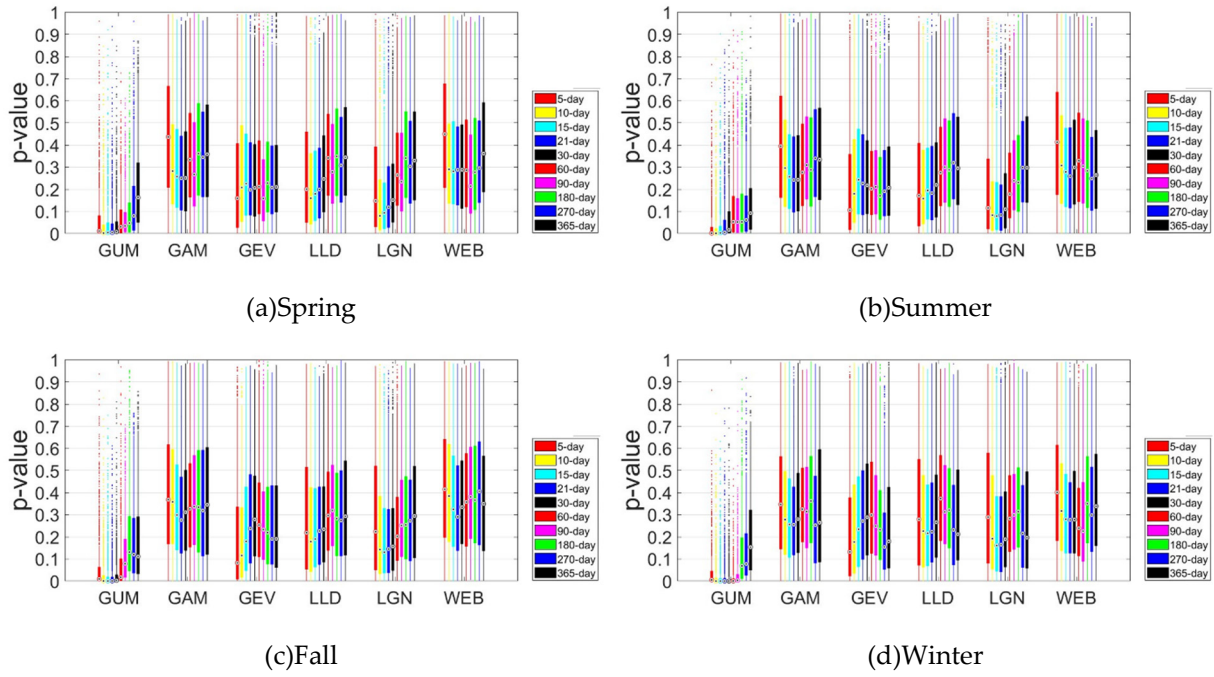

**Figure S5.** Box-plot of the  $p$ -values of the chi-square test for 6 candidate PDFs in 4 seasons in the Honam region. (a) Spring, (b) Summer, (c) Fall, (d) Winter

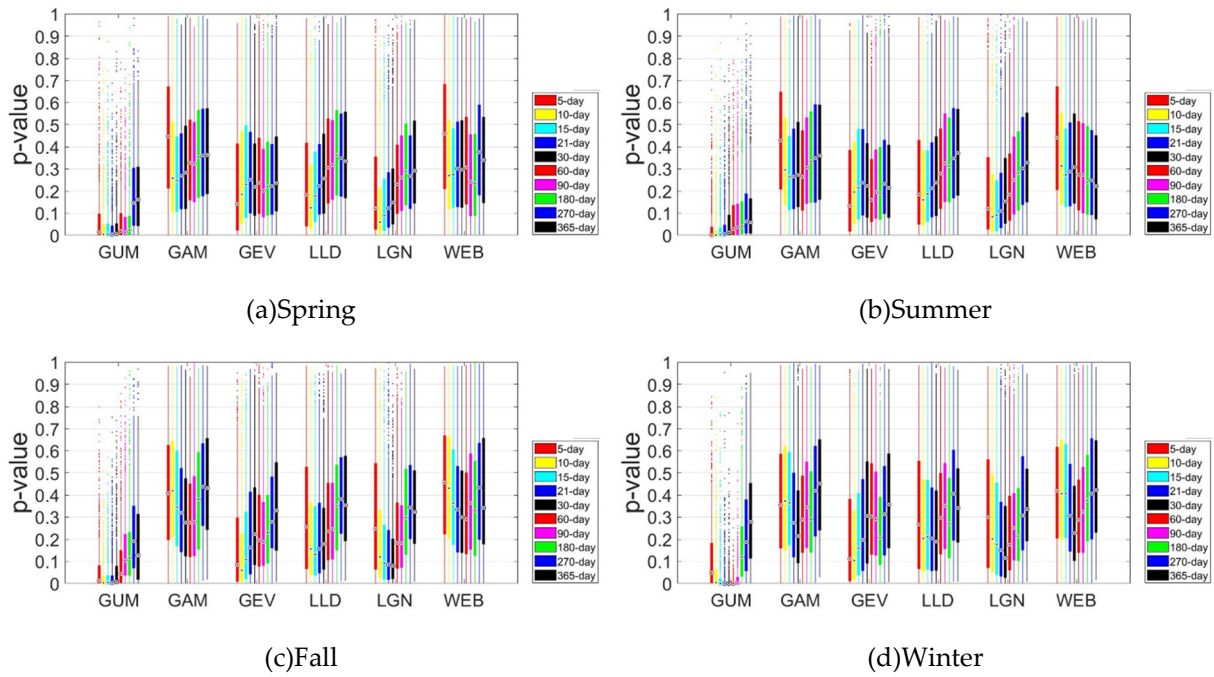

**Figure S6.** Box-plot of the  $p$ -values of the chi-square test for 6 candidate PDFs in 4 seasons in the Chungcheong region. (a) Spring, (b) Summer, (c) Fall, (d) Winter

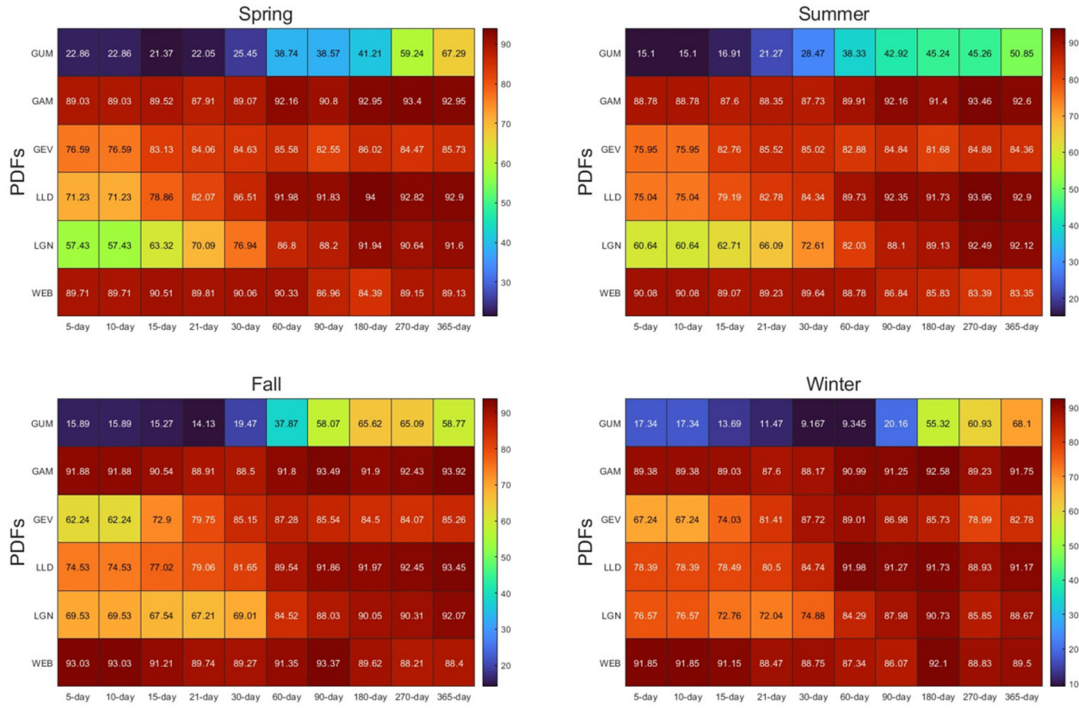

**Figure S7.** Heatmap of  $h(\%)$  of chi-square test for 6 candidate PDFs in 4 seasons. We can see the noticeably darker red cells in the GAM and WEB at all time-scales. Furthermore, we can see that as the time-scale increases, the  $h(\%)$  of all PDFs increases and the performance in terms of fit improves.

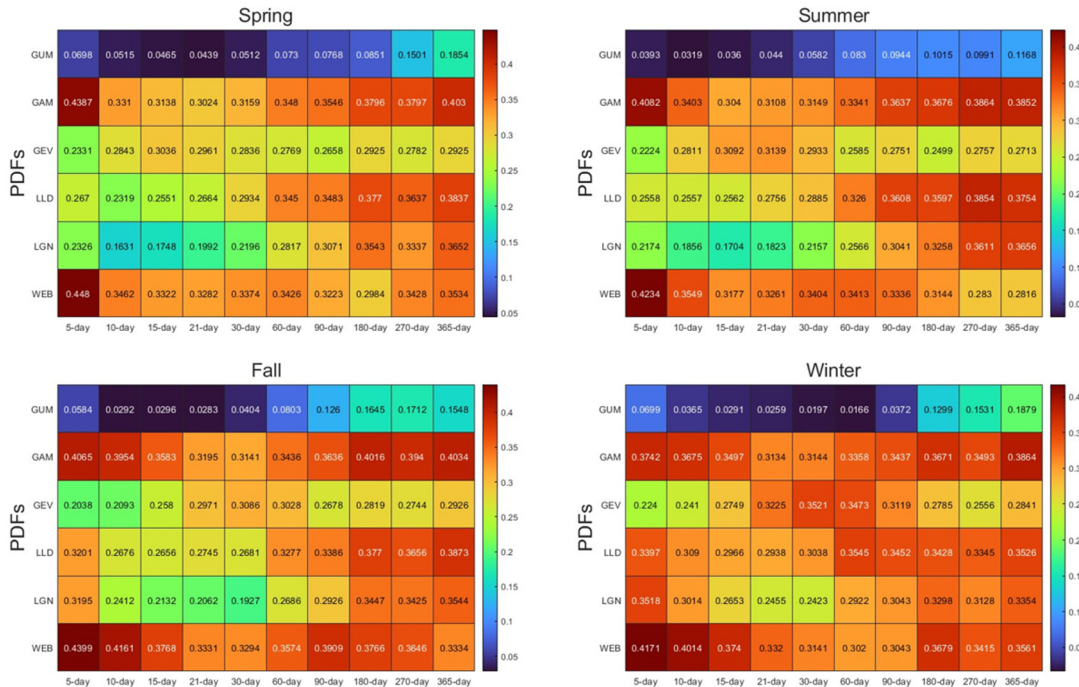

**Figure S8.** Heatmap of mean  $p$  of chi-square test for 6 candidate PDFs in 4 seasons. For mean  $p$ , we can also see that the overall  $p$ -value increases as the time-scale increases. However, in the case of WEB, the value of mean  $p$  is very high at short time-scales, and the value of mean  $p$  decreases as the time-scale increases.

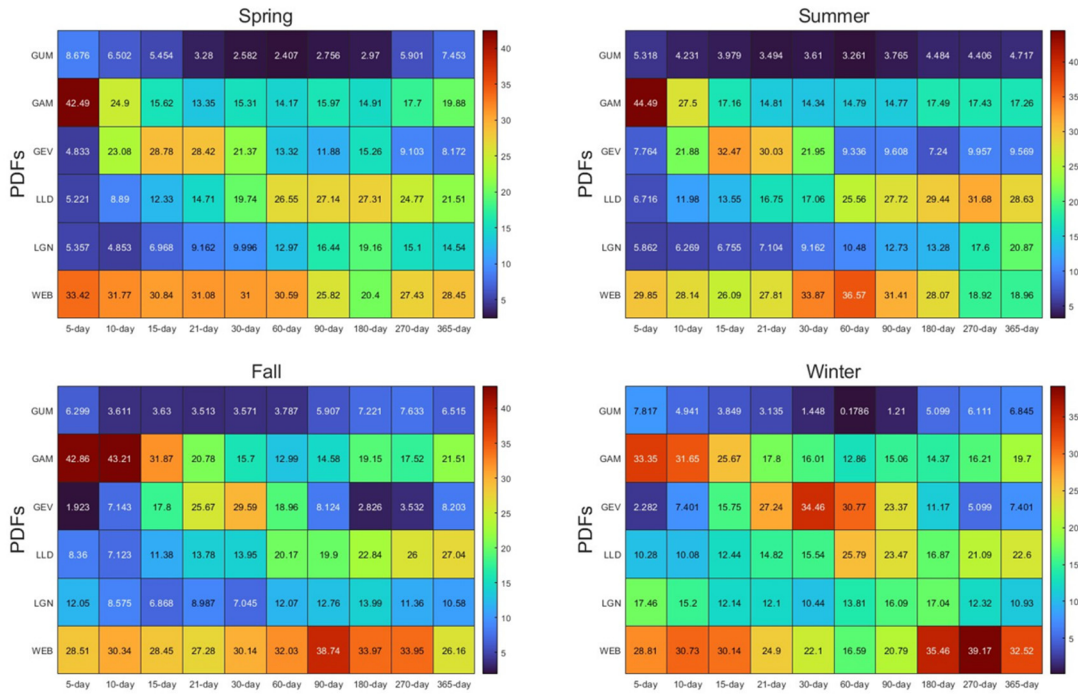

**Figure S9.** Heatmap of  $w(\%)$  of chi-square test for 6 candidate PDFs in 4 seasons.  $w(\%)$  shows that WEB is relatively superior at all timescales in all seasons. If you were to look at this figure alone, you would conclude that WEB is overwhelmingly superior, but  $w(\%)$  is just the percentage with the highest  $p$ -value. It should be used as a guide in analyses alongside the results of other metrics.

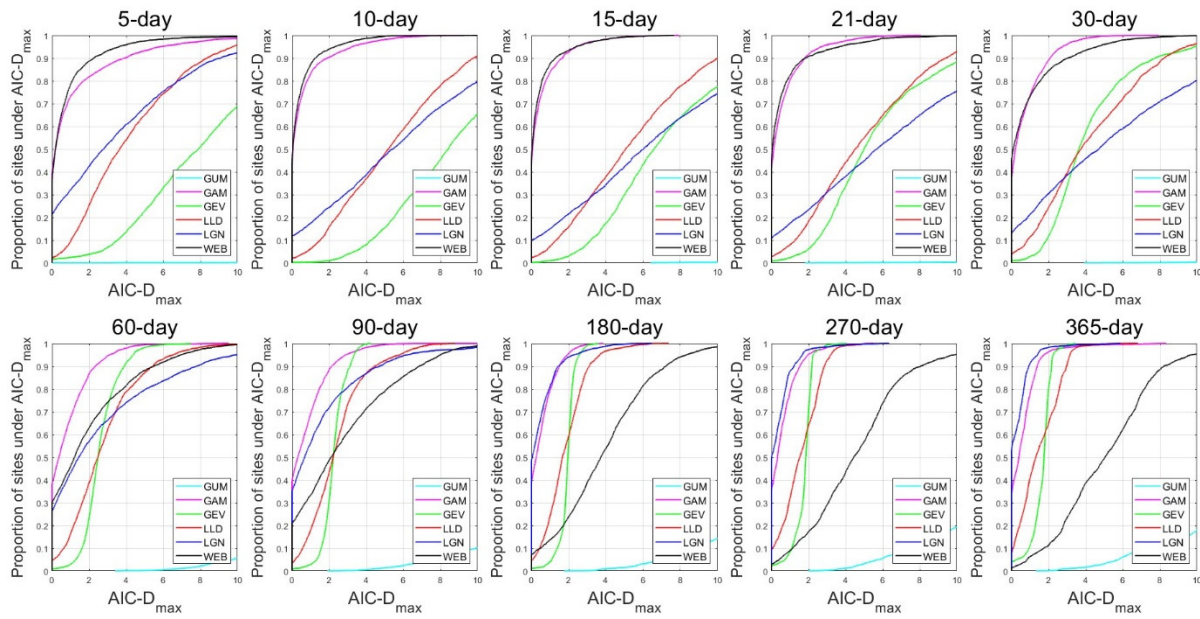

**Figure S10.** AIC frequencies for candidate PDFs in Gangwon region.

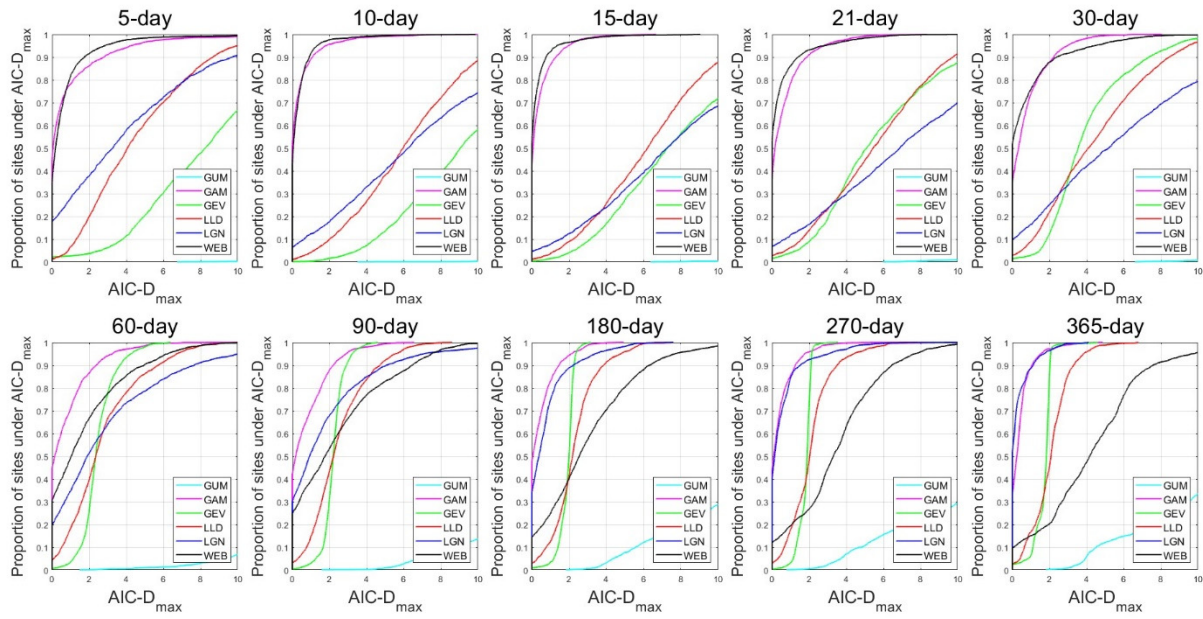

**Figure S11.** AIC frequencies for candidate PDFs in Capital region.

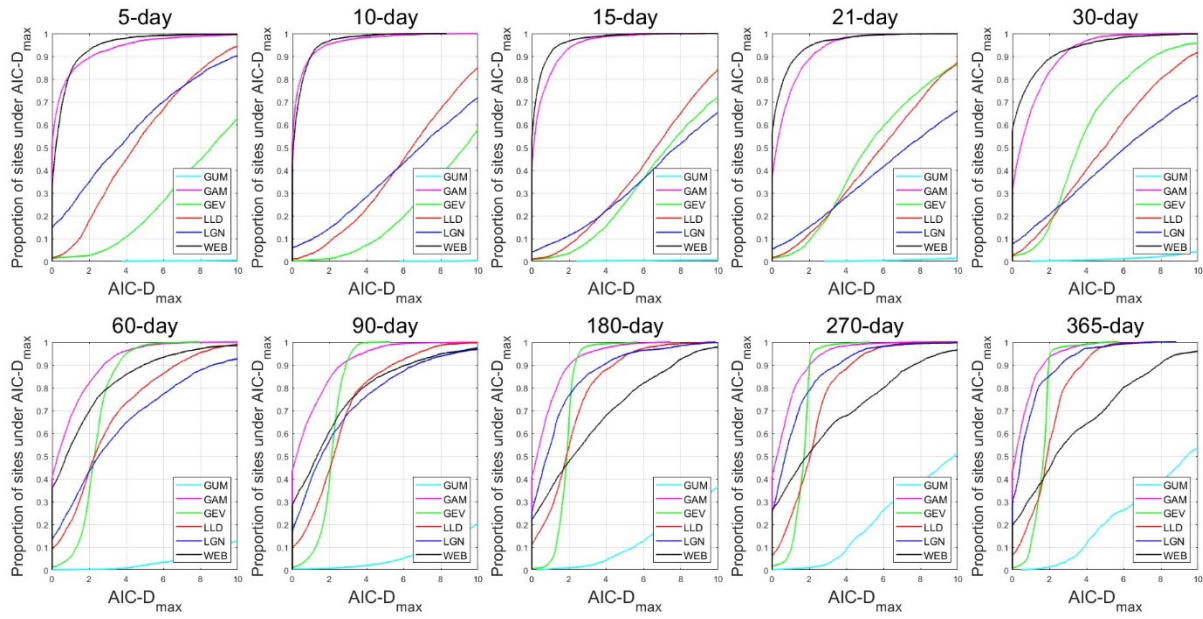

**Figure S12.** AIC frequencies for candidate PDFs in Buulgyeong region.

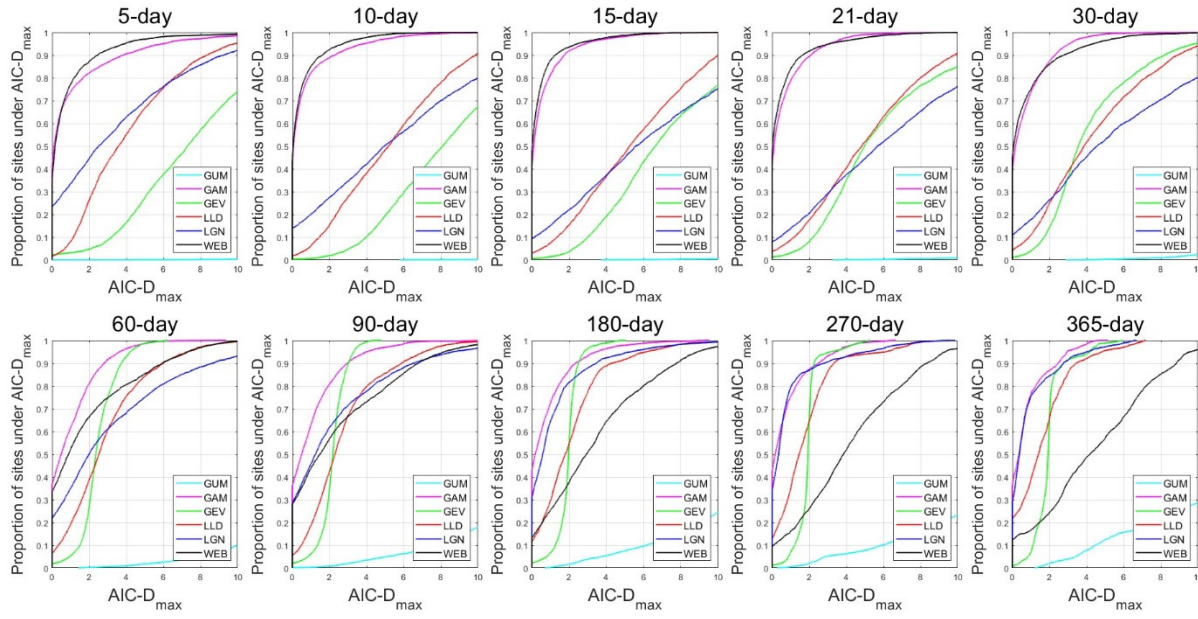

**Figure S13.** AIC frequencies for candidate PDFs in Daegyeong region.

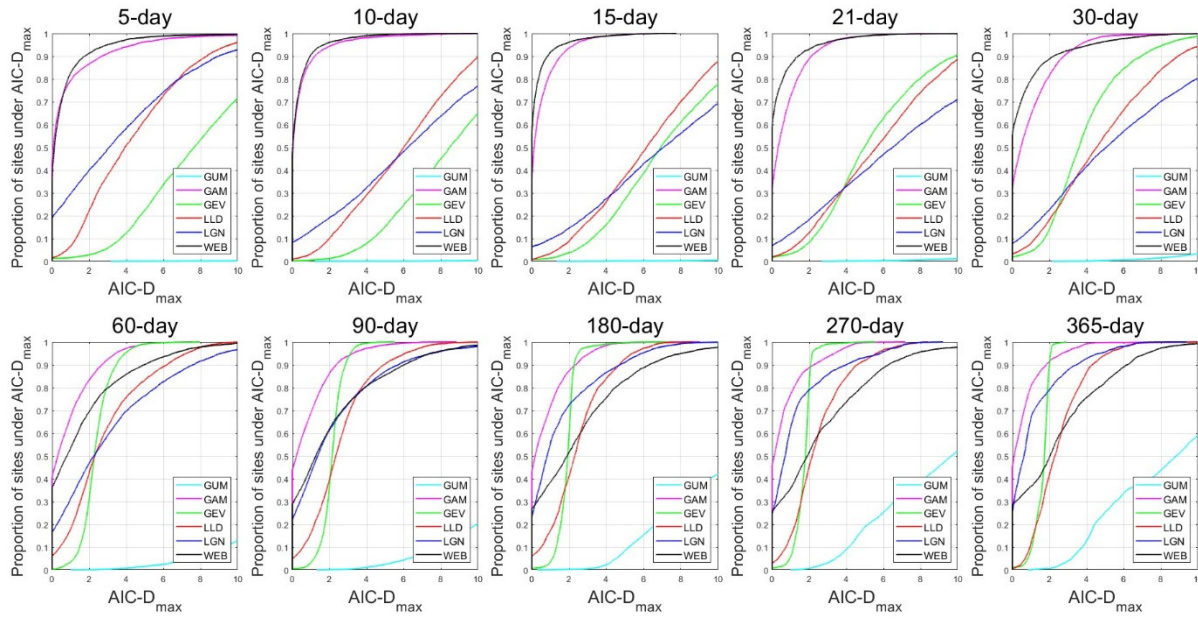

**Figure S14.** AIC frequencies for candidate PDFs in Honam region.

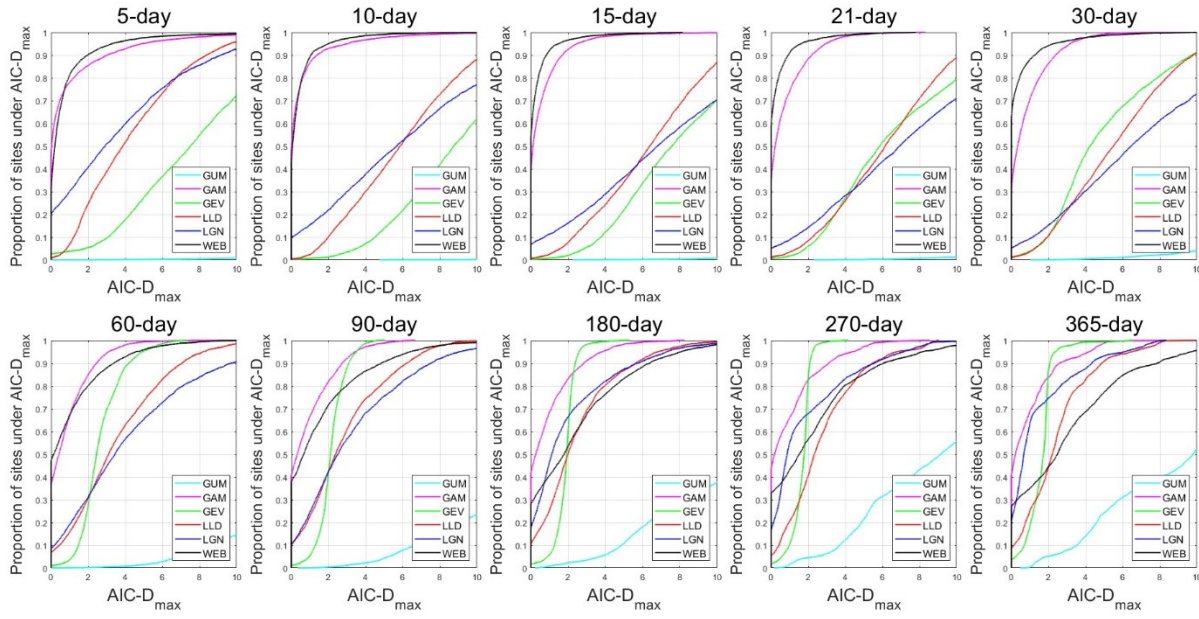

**Figure S15.** AIC frequencies for candidate PDFs in Chungcheong region.

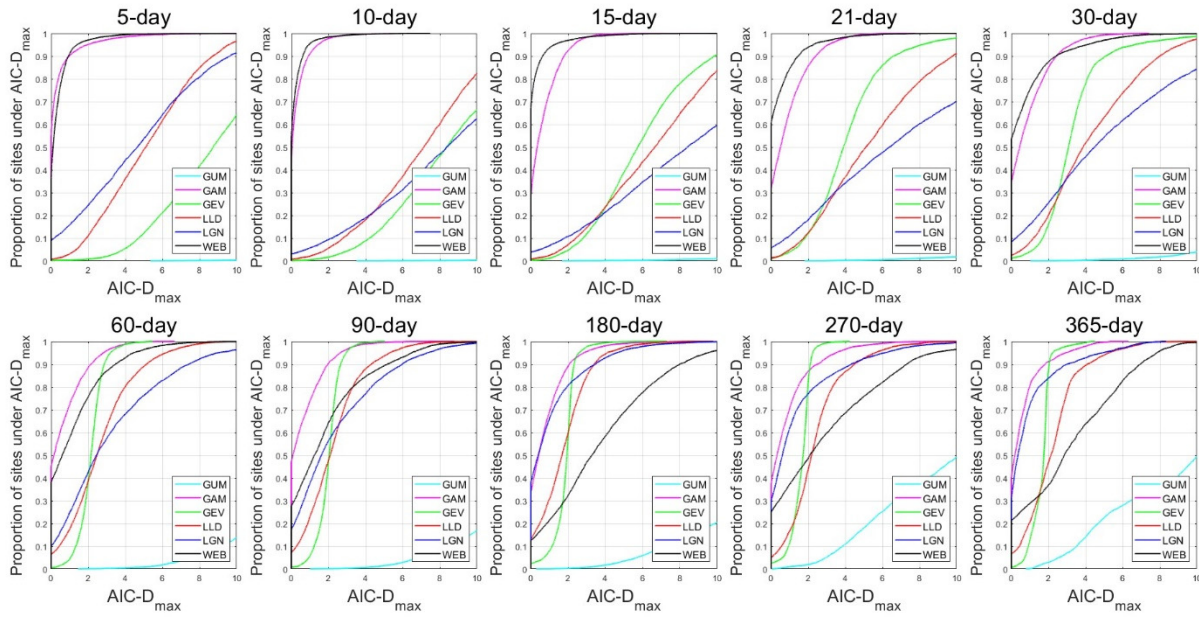

**Figure S16.** AIC frequencies for candidate PDFs in Spring season.

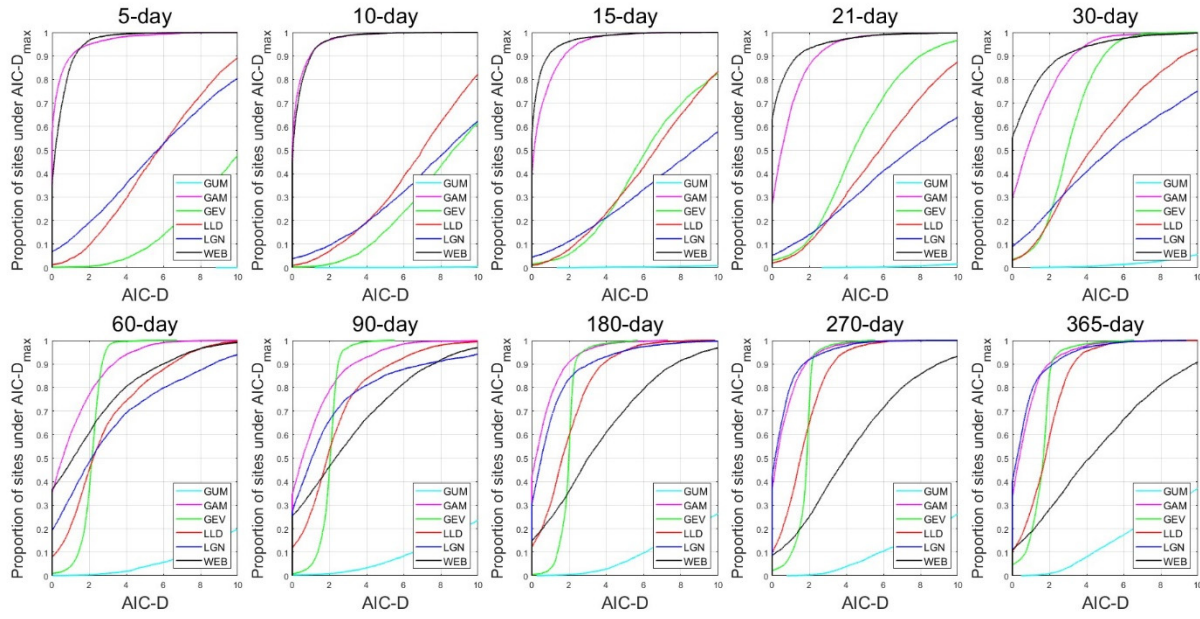

**Figure S17.** AIC frequencies for candidate PDFs in Summer season.

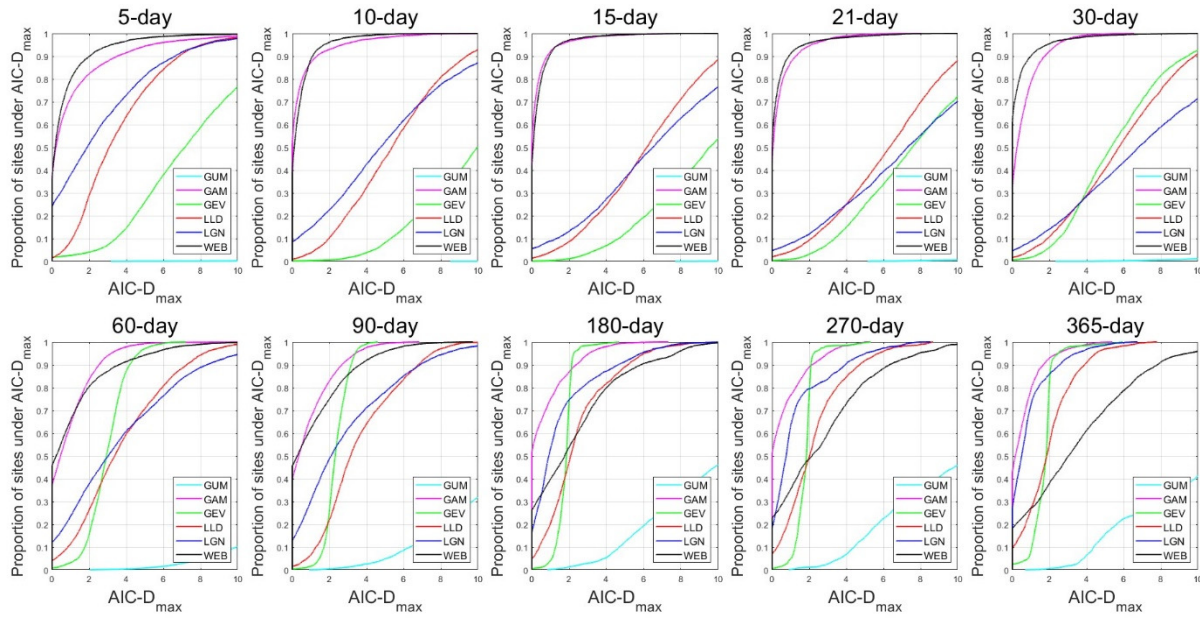

**Figure S18.** AIC frequencies for candidate PDFs in Fall season.

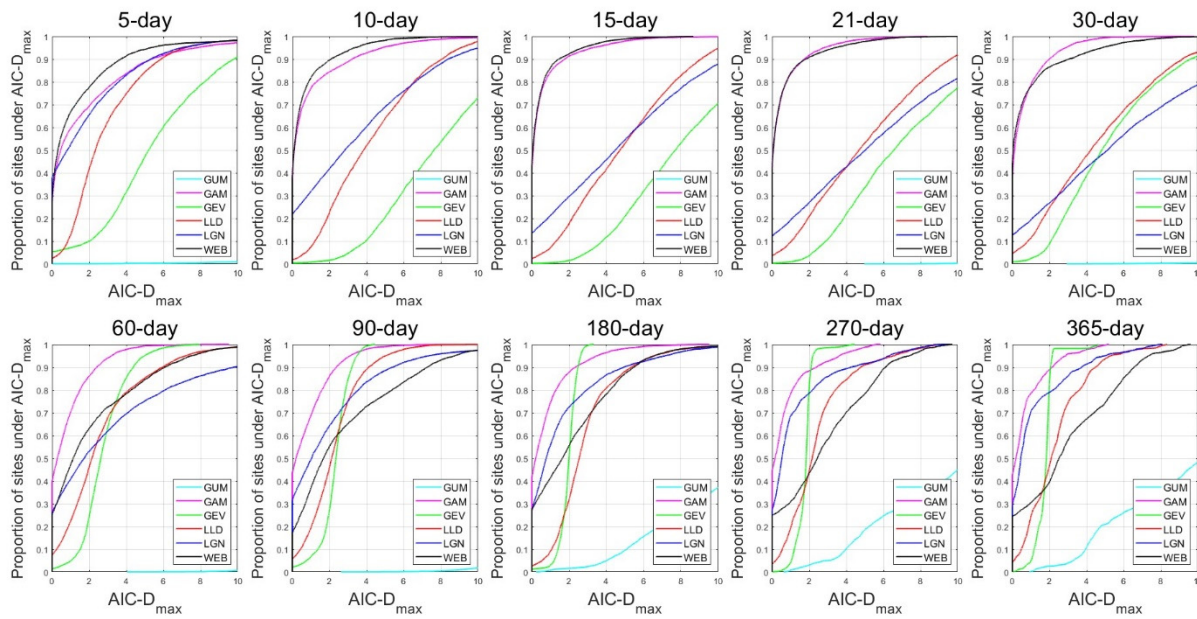

Figure S19. AIC frequencies for candidate PDFs in Winter season.

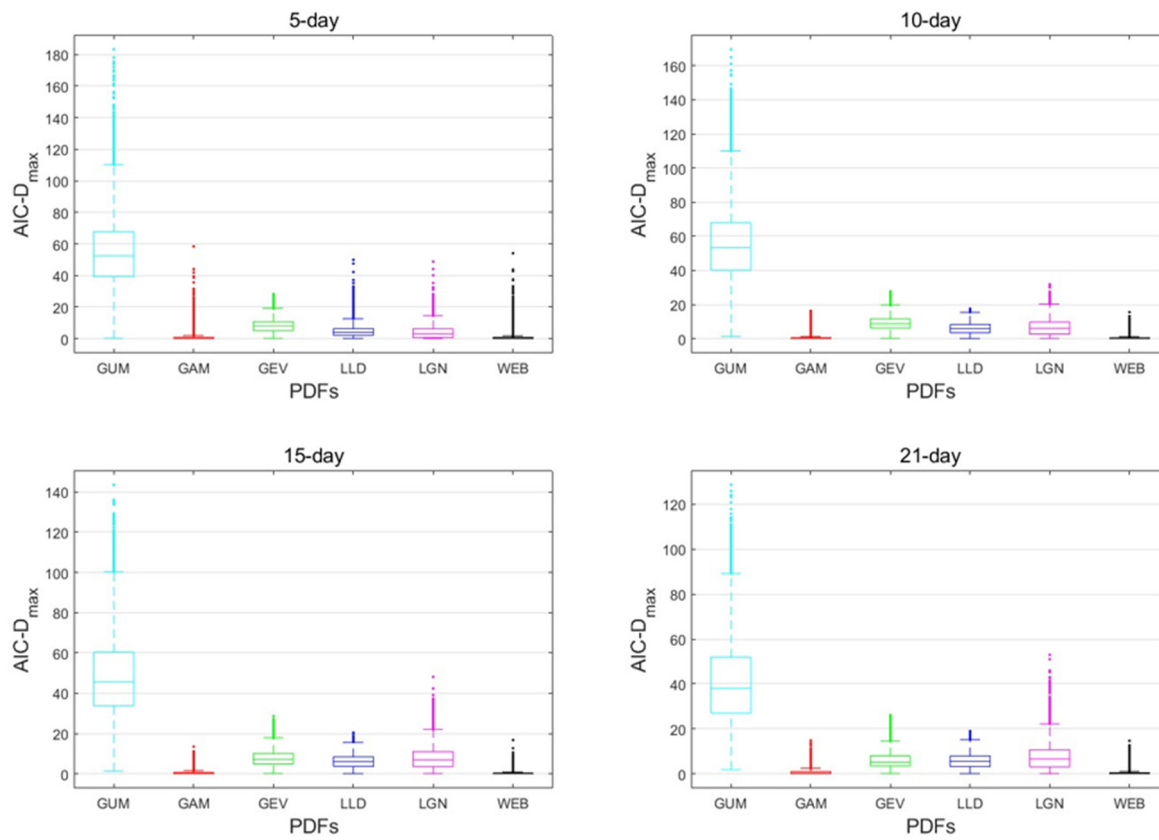

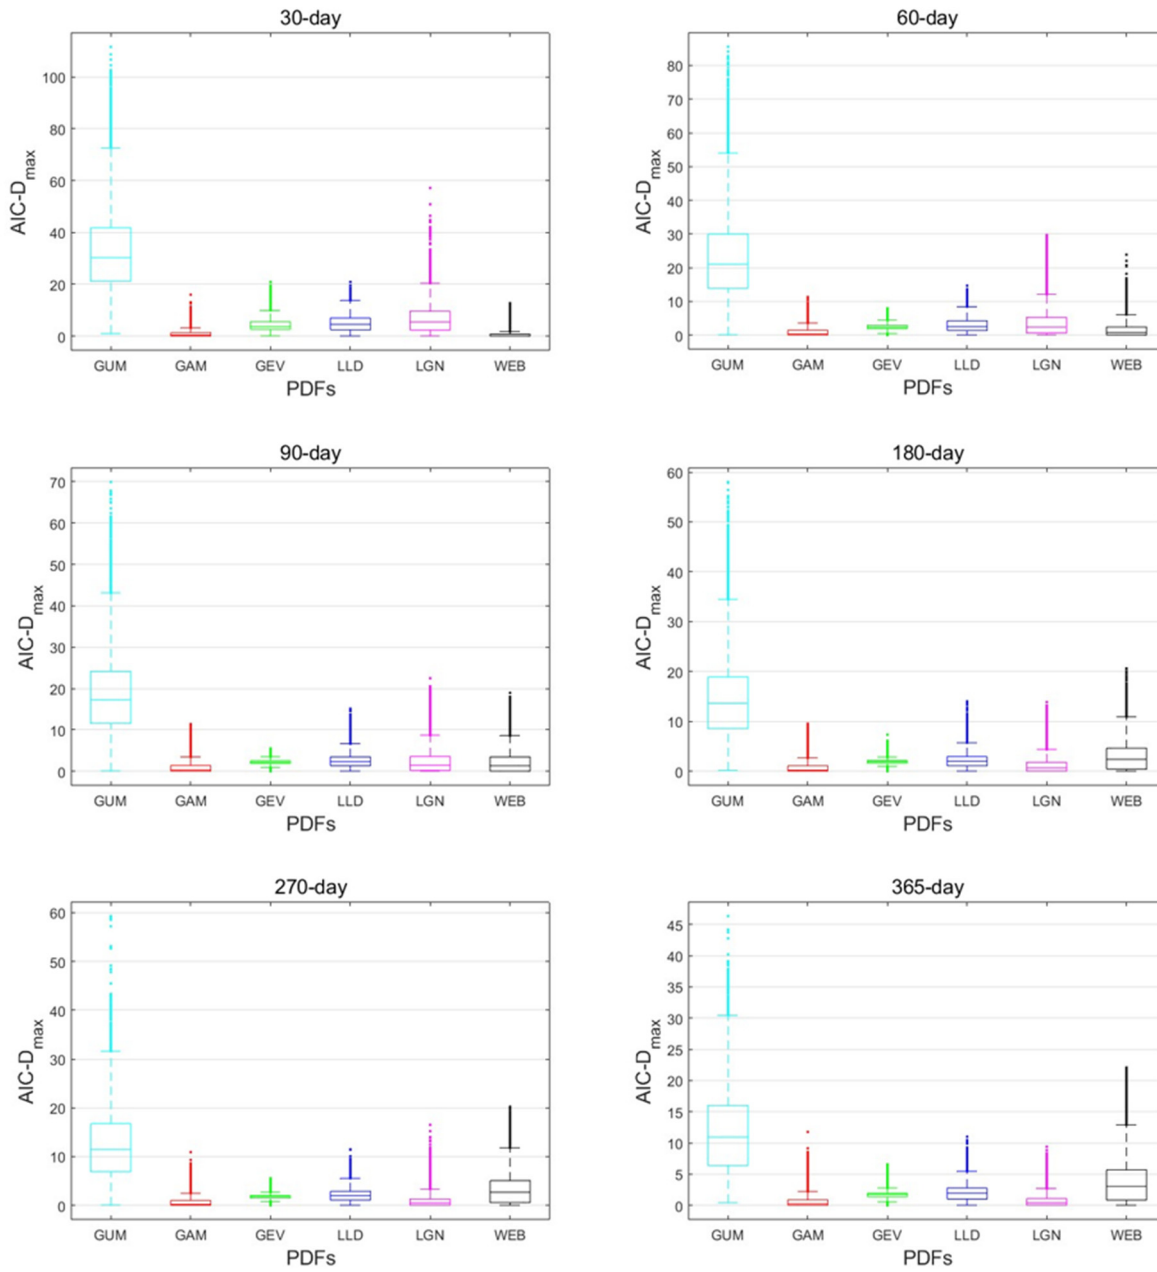

**Figure S20.** A box-plot showing  $AIC - D$  values for each probability distribution by time-scale. It can be seen that GUM has a large  $AIC - D$  value in all time-scales. GAM has a distribution of low  $AIC - D$  values in all time-scales and can confirm excellent performance. In LLD and LGN, as the time-scale increases, the  $AIC - D$  value generally decreases. In the case of WEB, excellent results are shown in a short time-scale, but as the time-scale increases, the distribution of  $AIC - D$  values also increase.

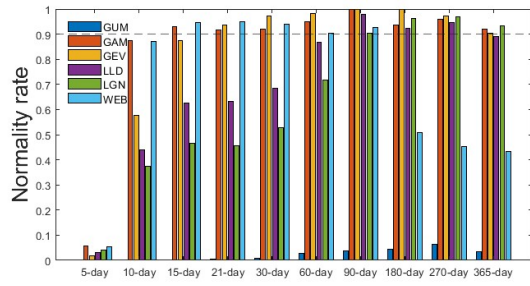

(a) Spring

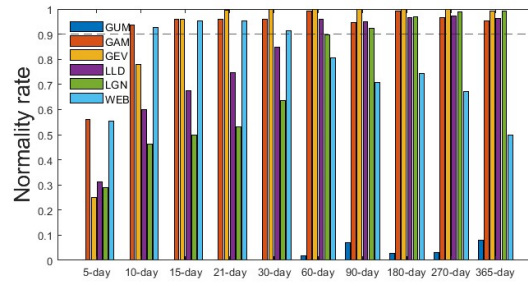

(b) Summer

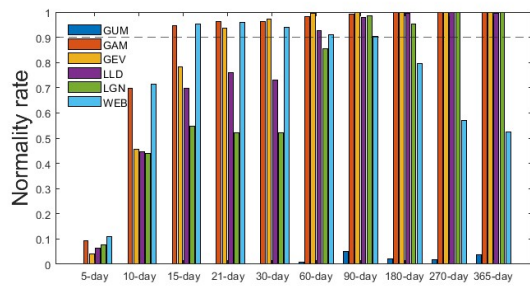

(c) Fall

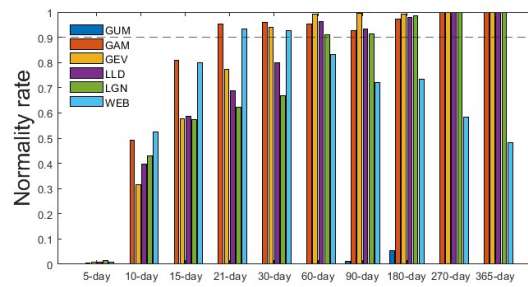

(d) Winter

**Figure S21.** Normality ratio for 6 candidate PDFs in all seasons in the Gangwon region. (a) Spring, (b) Summer, (c) Fall, (d) Winter

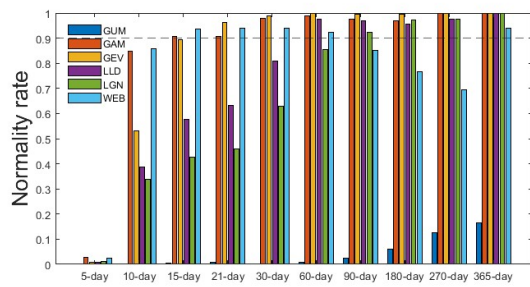

(a) Spring

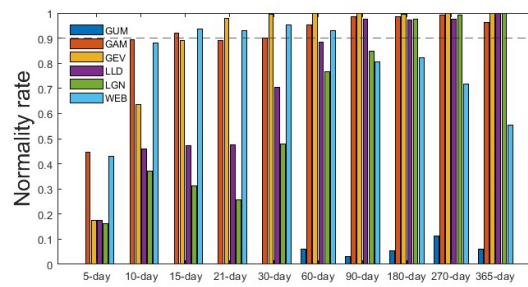

(b) Summer

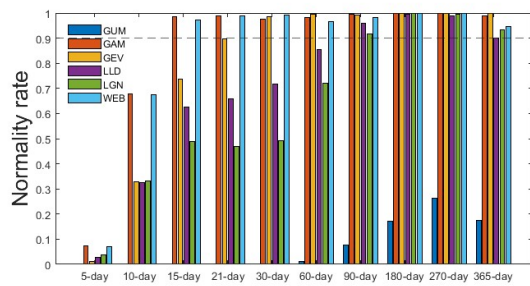

(c) Fall

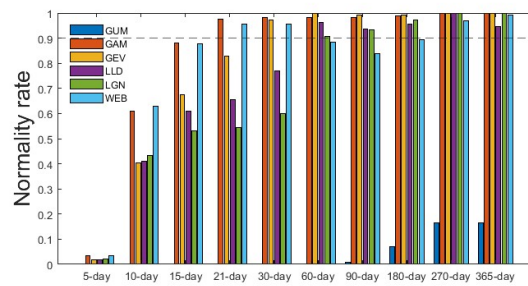

(d) Winter

**Figure S22.** Normality ratio for 6 candidate PDFs in all seasons in the Capital region. (a) Spring, (b) Summer, (c) Fall, (d) Winter

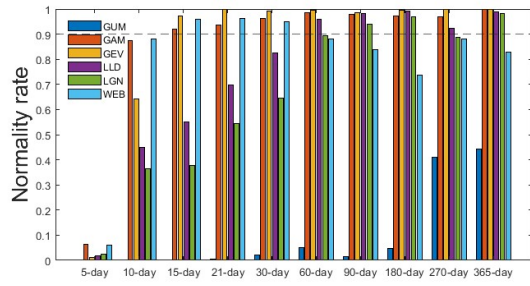

(a) Spring

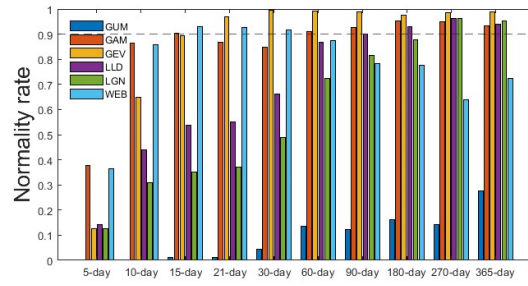

(b) Summer

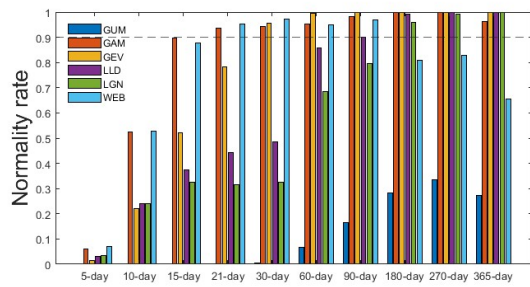

(c) Fall

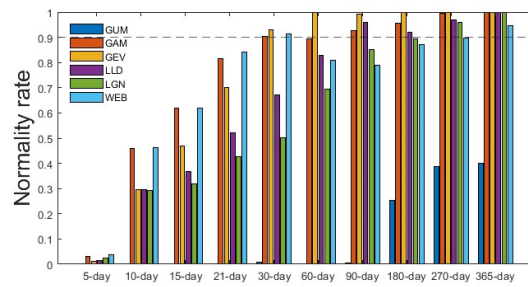

(d) Winter

**Figure S23.** Normality ratio for 6 candidate PDFs in all seasons in the Buulgyeong region. (a) Spring, (b) Summer, (c) Fall, (d) Winter

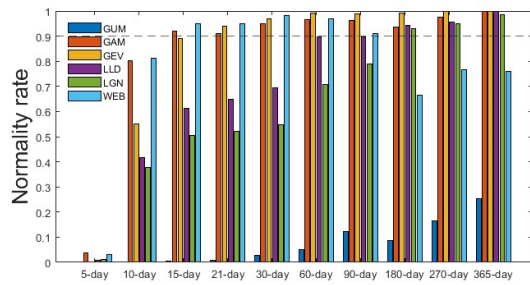

(a) Spring

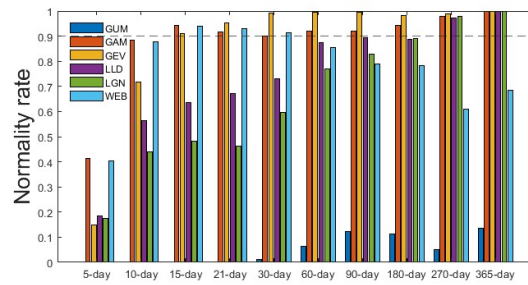

(b) Summer

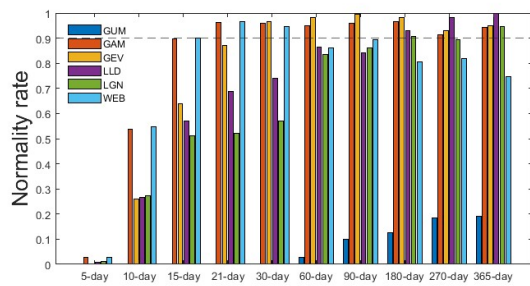

(c) Fall

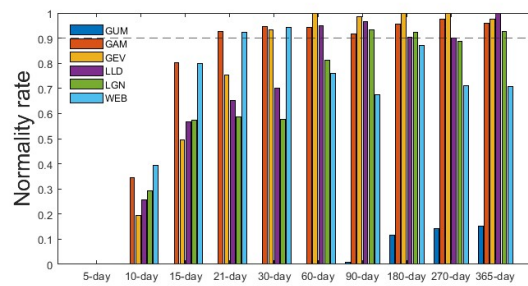

(d) Winter

**Figure S24.** Normality ratio for 6 candidate PDFs in all seasons in the Daegyeong region. (a) Spring, (b) Summer, (c) Fall, (d) Winter

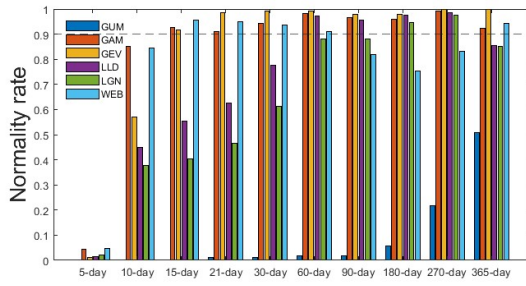

(a) Spring

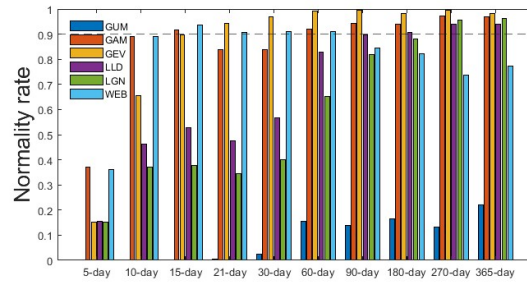

(b) Summer

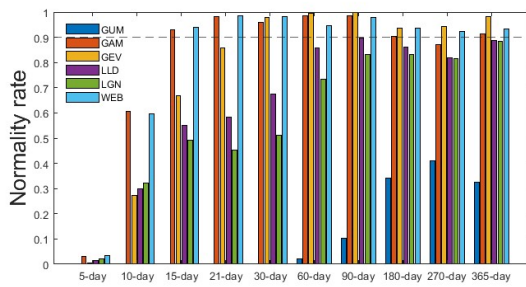

(c) Fall

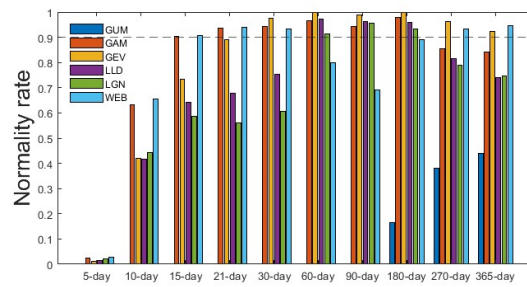

(d) Winter

**Figure S25.** Normality ratio for 6 candidate PDFs in all seasons in the Honam region. (a) Spring, (b) Summer, (c) Fall, (d) Winter

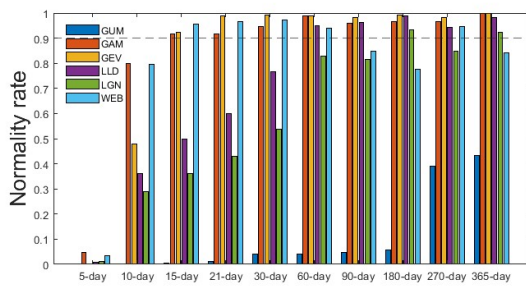

(a) Spring

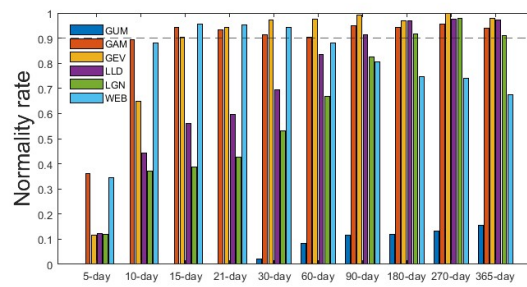

(b) Summer

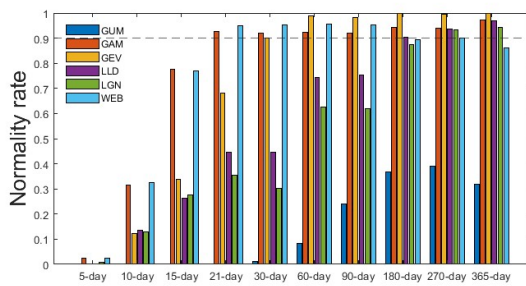

(c) Fall

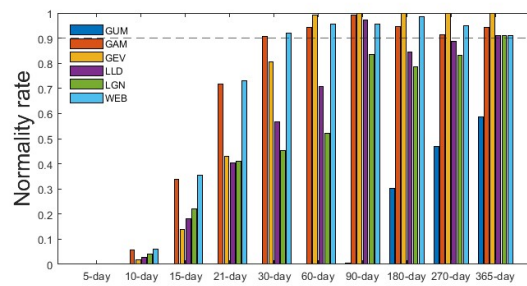

(d) Winter

**Figure S26.** Normality ratio for 6 candidate PDFs in all seasons in the Chungcheong region. (a) Spring, (b) Summer, (c) Fall, (d) Winter

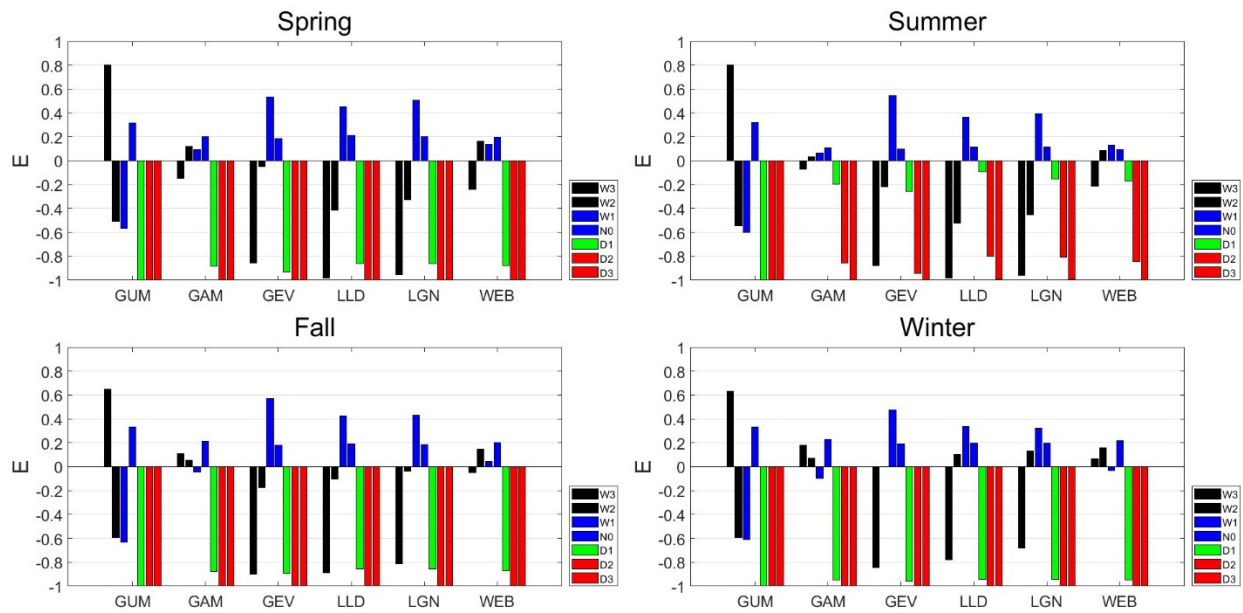

Figure S27. Error rate of SPI at 5-day calculated per drought class in all seasons across all sites.

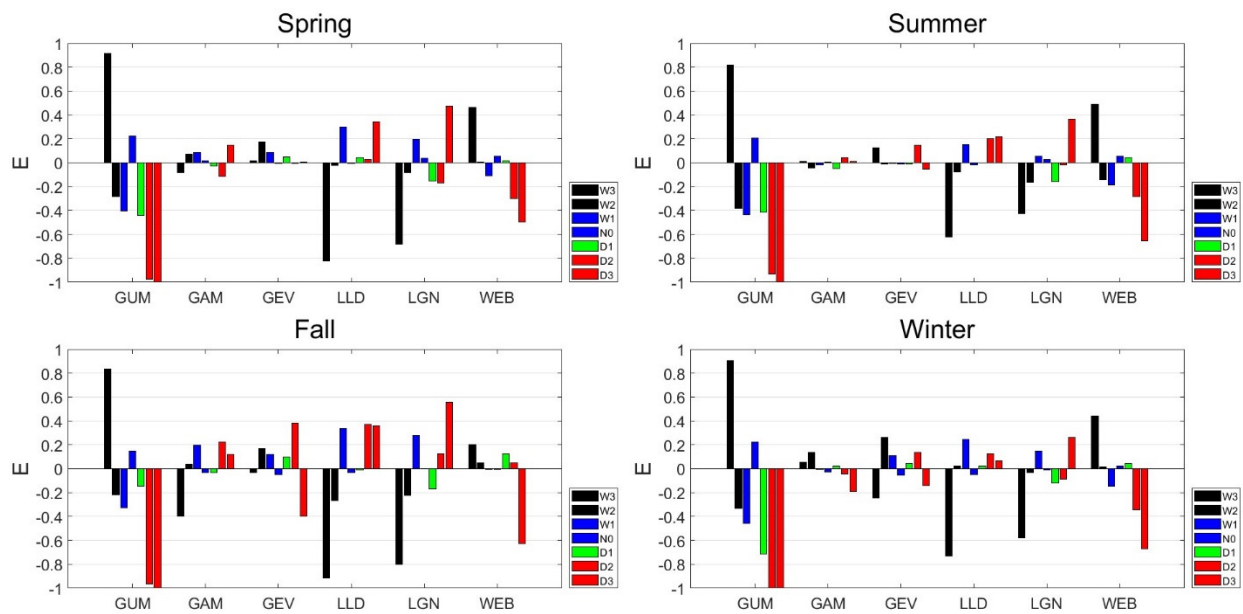

Figure S28. Error rate of SPI at 90-day calculated per drought class in all seasons across all sites.

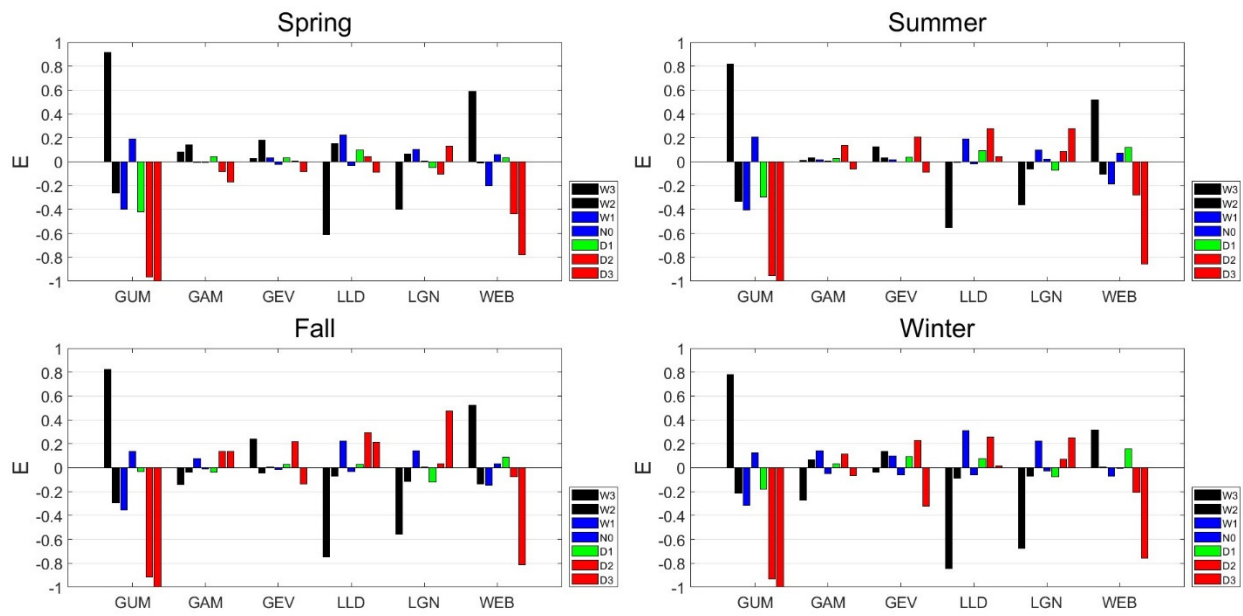

Figure S29. Error rate of SPI at 180-day calculated per drought class in all seasons across all sites.

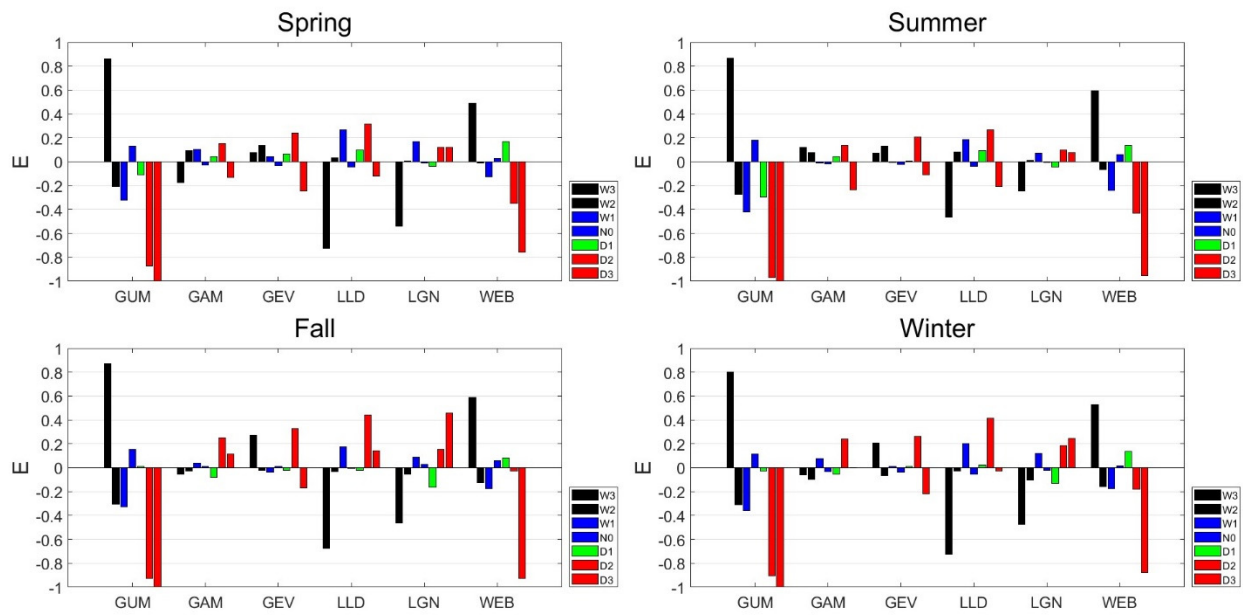

Figure S30. Error rate of SPI at 270-day calculated per drought class in all seasons across all sites.

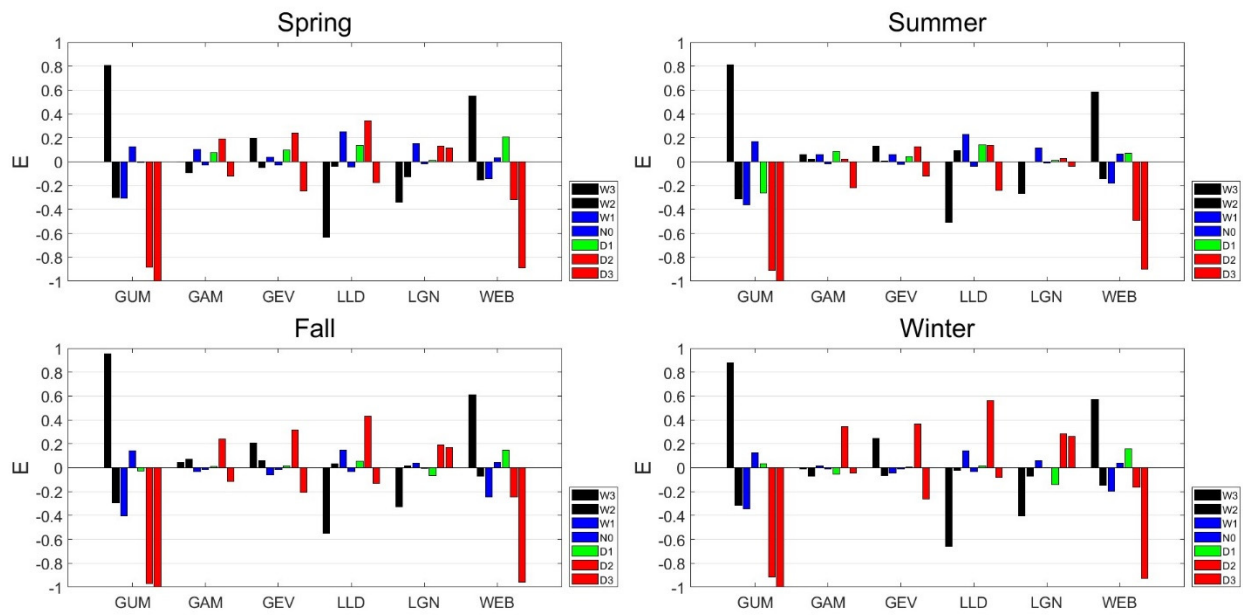

**Figure S31.** Error rate of SPI at 365-day calculated per drought class in all seasons across all sites.

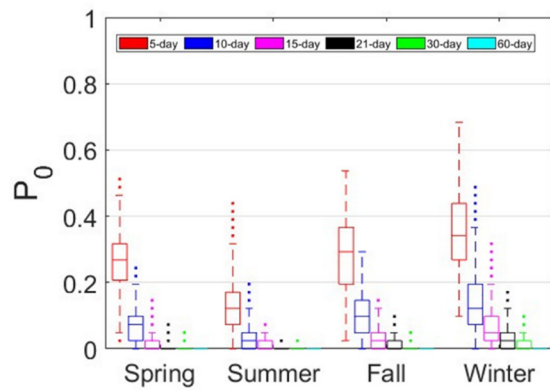

(a)Capital

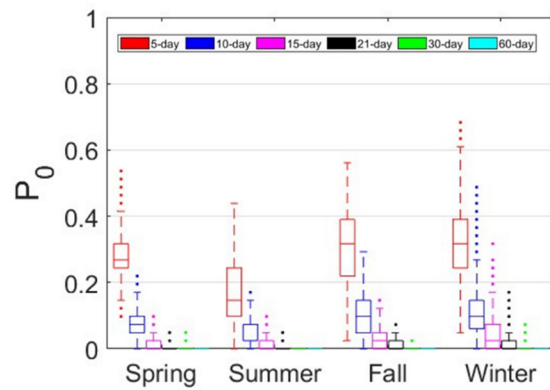

(b)Gangwon

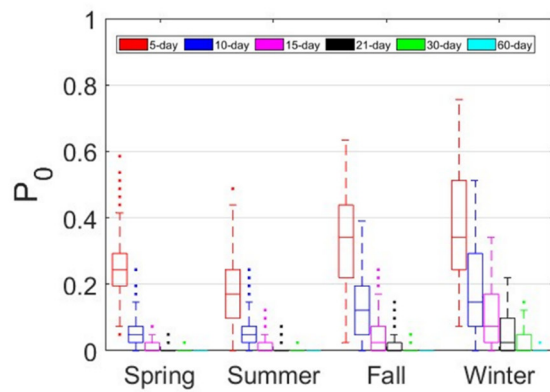

(c)Chungcheong

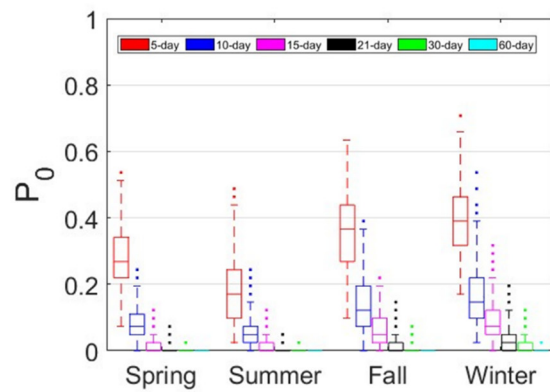

(d)Daegyeong

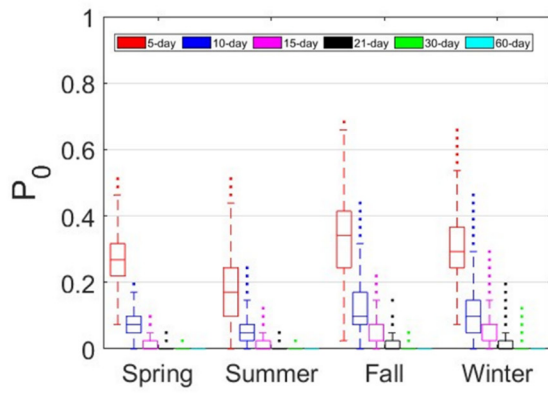

(e)Honam

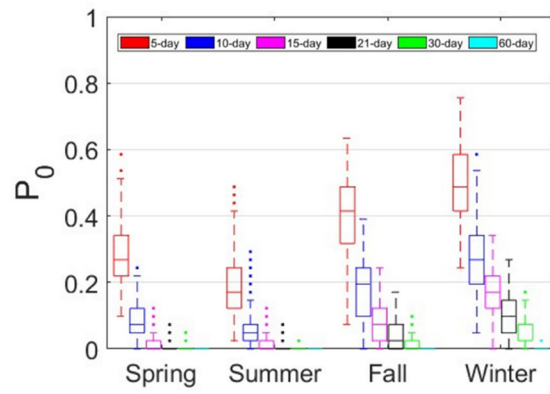

(f)Buulgyeong

**Figure S32.** Rate of cumulative time series having zero value in all seasons of each time-scale (5-day, 10-day, 15-day, 21-day, 30-day, 60-day) for each region. (a) Capital, (b) Gangwon, (c) Chungcheong, (d) Daegyeong, (e) Honam, (f) Buulgyeong
